# Supplementary material
Source: PubMed Central journal article supplement (PMC10167918)
Supplement: NIHMS1884574-supplement-supplementary_table1.pdf [file NIHMS1884574-supplement-supplementary_table1.pdf]

Supplementary Table 1. Number of mpMRI-Visible Lesions at Time of Enrollment in Active Surveillance

| <b>Table 3: Number of mpMRI-Visible Lesions at Time of Enrollment in Active Surveillance</b> |              |                          |                         |                   |
|----------------------------------------------------------------------------------------------|--------------|--------------------------|-------------------------|-------------------|
|                                                                                              | <b>Total</b> | <b>Unilateral (n=72)</b> | <b>Bilateral (n=31)</b> | <b>P-value</b>    |
| Median (IQR)                                                                                 | 1.5 (1-2)    | 2 (1-3)                  | 2 (2-3)                 | 0.30 <sup>+</sup> |
| <b>0</b>                                                                                     | 1 (0.97%)    | 0                        | 1 (3.23%)               | 0.31*             |
| <b>1</b>                                                                                     | 34 (33.01%)  | 28 (38.89%)              | 6 (19.35%)              |                   |
| <b>2</b>                                                                                     | 23 (22.33%)  | 14 (19.44%)              | 9 (29.03%)              |                   |
| <b>3</b>                                                                                     | 28 (27.18%)  | 19 (26.39%)              | 9 (29.03%)              |                   |
| <b>4</b>                                                                                     | 12 (11.65%)  | 7 (9.72%)                | 5 (16.13%)              |                   |
| <b>5</b>                                                                                     | 4 (3.88%)    | 3 (4.17%)                | 1 (3.23%)               |                   |
| <b>6</b>                                                                                     | 1 (0.97%)    | 1 (1.39%)                | 0                       |                   |
| +*Mann Whitney U test comparison of medians                                                  |              |                          |                         |                   |
| *Chi-squared test comparison of distributions                                                |              |                          |                         |                   |
