# Supplementary material
Source: PubMed Central journal article supplement (PMC10167918)
Supplement: NIHMS1884574-supplement-supplementary_table2.pdf [file NIHMS1884574-supplement-supplementary_table2.pdf]

Supplementary Table 2. Clinical variables at time of confirmatory biopsy associated with subsequent active surveillance progression to GG $\geq$ 3. HR=hazards ratio, PSA=prostate-specific antigen, PSAD=prostate-specific antigen density

|                                     | <u>Multivariate</u> |                    |
|-------------------------------------|---------------------|--------------------|
|                                     | <b>HR</b>           | <b>p-value</b>     |
| Age                                 | 1.10 [1.02-1.19]    | <b>0.011*</b>      |
| PSA                                 | 1.01 [0.86-1.17]    | 0.95               |
| PSAD                                | 2.86 [1.65-4.97]    | <b>&lt;0.001**</b> |
| Positive Cores on Systematic Biopsy | 1.04 [0.77-1.39]    | 0.82               |
| Bilateral disease                   | 4.89 [1.60-15.02]   | <b>0.005**</b>     |
